# Supplementary material
Source: MDPI journal article supplement (https://www.mdpi.com/1424-2818/13/12/685)
Supplement: s1 [file s1]

**Table S1.** Terrain properties and input characteristics of 19 lakes.

| Sites | Lakes         | Lon<br>(°E) | Lat<br>(°N) | Alt<br>(m) | Area<br>(km <sup>2</sup> ) | water source |
|-------|---------------|-------------|-------------|------------|----------------------------|--------------|
| 1     | Angrenjincuo  | 87.168      | 29.306      | 4314.7     | 24.3                       | SR           |
| 2     | Gongdoucuo    | 86.262      | 29.543      | 4757.9     | 3.3*                       | -            |
| 3     | Dajiamangcuo  | 85.744      | 29.625      | 5077.1     | 10.0*                      | -            |
| 4     | Dajiacuo      | 85.754      | 29.796      | 5156.5     | 114.5                      | SR and GR    |
| 5     | Dongcuo       | 84.732      | 32.122      | 4414.1     | 87.7                       | SR           |
| 6     | Xiagacuo      | 83.831      | 32.269      | 4385.6     | 23.2                       | river        |
| 7     | Daraocuo      | 83.192      | 32.449      | 4447.0     | 21.0                       | river        |
| 8     | Wumacuo       | 83.190      | 32.443      | 4454.1     | 4.4                        | river        |
| 9     | Bieruozequo   | 82.965      | 32.407      | 4430.5     | 33.2                       | river        |
| 10    | Bangongcuo    | 79.867      | 33.578      | 4263.7     | 604.0                      | SR           |
| 11    | Bangongcuo    | 79.786      | 33.442      | 4263.2     |                            |              |
| 12    | La'angcuo     | 81.309      | 30.681      | 4595.2     | 268.5                      | river        |
| 13    | Mapangyongcuo | 81.373      | 30.767      | 4619.0     | 412.0                      | RR and SR    |
| 14    | Gongzhucuo    | 82.049      | 30.672      | 4804.5     | 66.2                       | SR           |
| 15    | Cuochuolong   | 85.376      | 29.125      | 4661.3     | 17.3                       | SR           |
| 16    | Peikucuo      | 85.511      | 28.812      | 4593.9     | 284.4                      | RR and GR    |
| 17    | Galacuo       | 89.362      | 28.262      | 4430.7     | 26.6                       | river        |
| 18    | Duoqingcuo    | 89.363      | 28.175      | 4498.9     | 60.0                       | river        |
| 19    | Pumoyongcuo   | 90.514      | 28.582      | 5037.5     | 290.0                      | RR and GR    |
| 20    | Konmucuo      | 90.390      | 29.013      | 4447.5     | 40.4                       | river        |

Note: 1. Lon, Lat, Alt, SR, GR, and RR represent longitude, latitude, altitude, Surface Runoff, Glacier Runoff, and Rainfall Runoff, respectively.

2. Lake Bangongcuo was treated as two sites because of its long and narrow shape.

3. The information about lake area and main source of water feeding are from the book *Lakes of China* <sup>#</sup>.

4. \* the information about the area of Lake Gongdoucuo and Dajiamangcuo (site 2 and 3) are lacking from the book. We estimated them by ArcGIS according to the area of other lakes.

#### # Literature cited

Wang, S.M.; Dou, H.S.; Ed.; *Lakes of China*, 1st ed.; Science Press: Beijing, China, 1998; pp.401-472 (in Chinese).
