# Supplementary material
Source: MDPI journal article supplement (https://www.mdpi.com/1424-2818/13/12/685)
Supplement: s1 [file s1]

Archive with 7 entries (6 files):
- diversity-1481916-supplementary/Supplementary Files (round2)/
- diversity-1481916-supplementary/Supplementary Files (round2)/Fig.S1.tif
- diversity-1481916-supplementary/Supplementary Files (round2)/Fig.S2.tiff
- diversity-1481916-supplementary/Supplementary Files (round2)/Fig.S3.jpg
- diversity-1481916-supplementary/Supplementary Files (round2)/Fig.S4.jpg
- diversity-1481916-supplementary/Supplementary Files (round2)/Fig.S5.tiff
- diversity-1481916-supplementary/Supplementary Files (round2)/Table S1.pdf
