# Supplementary material
Source: MDPI journal article supplement (https://www.mdpi.com/1424-2818/13/12/685)

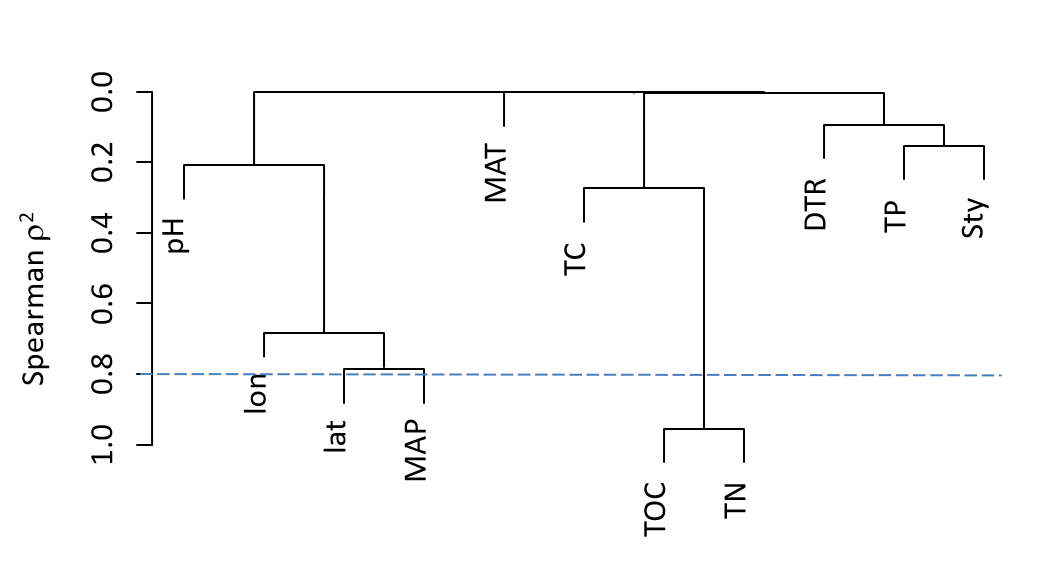

Supplement: s1 [file s1 › diversity-1481916-supplementary/Supplementary Files (round2)/Fig.S1.tif]

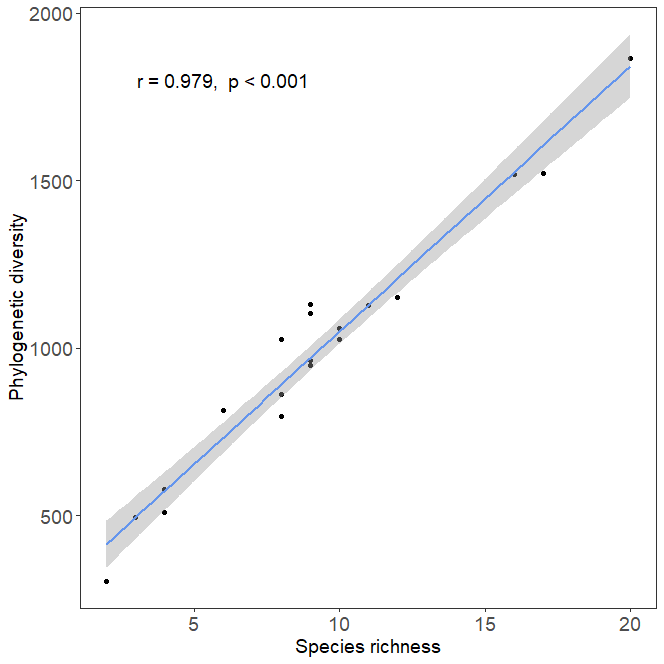

Supplement: s1 [file s1 › diversity-1481916-supplementary/Supplementary Files (round2)/Fig.S2.tiff]

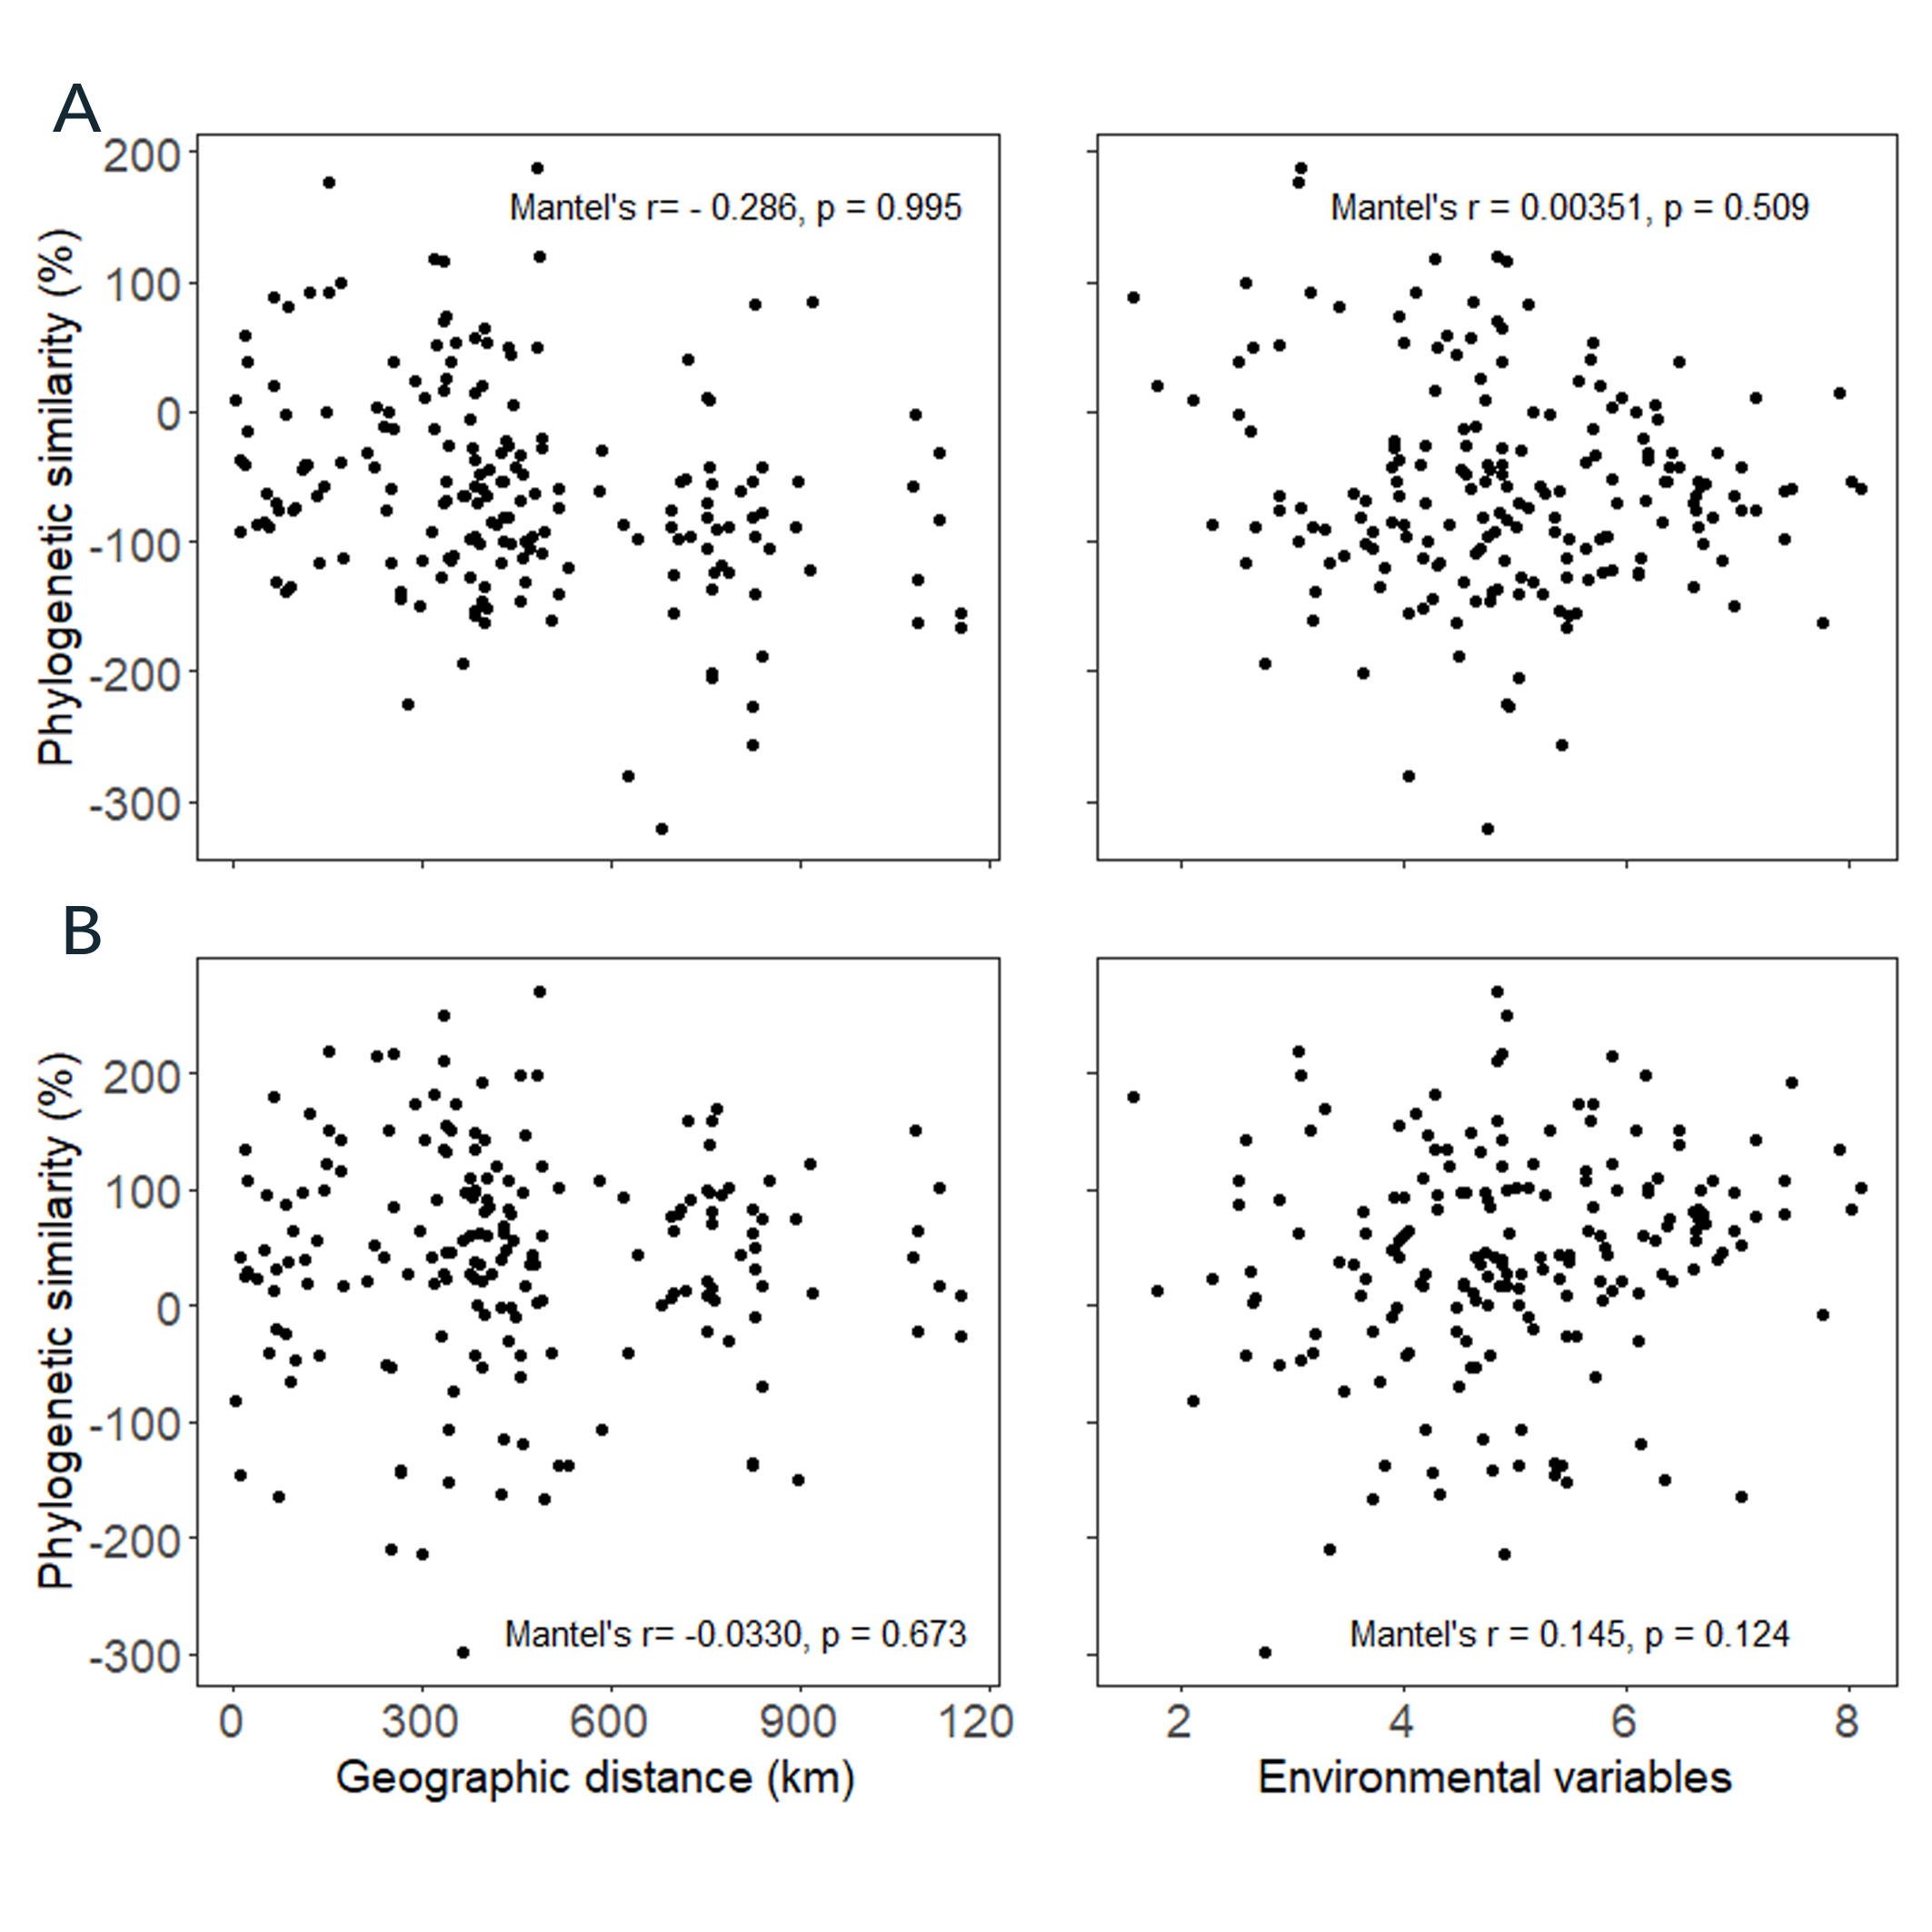

Supplement: s1 [file s1 › diversity-1481916-supplementary/Supplementary Files (round2)/Fig.S3.jpg]

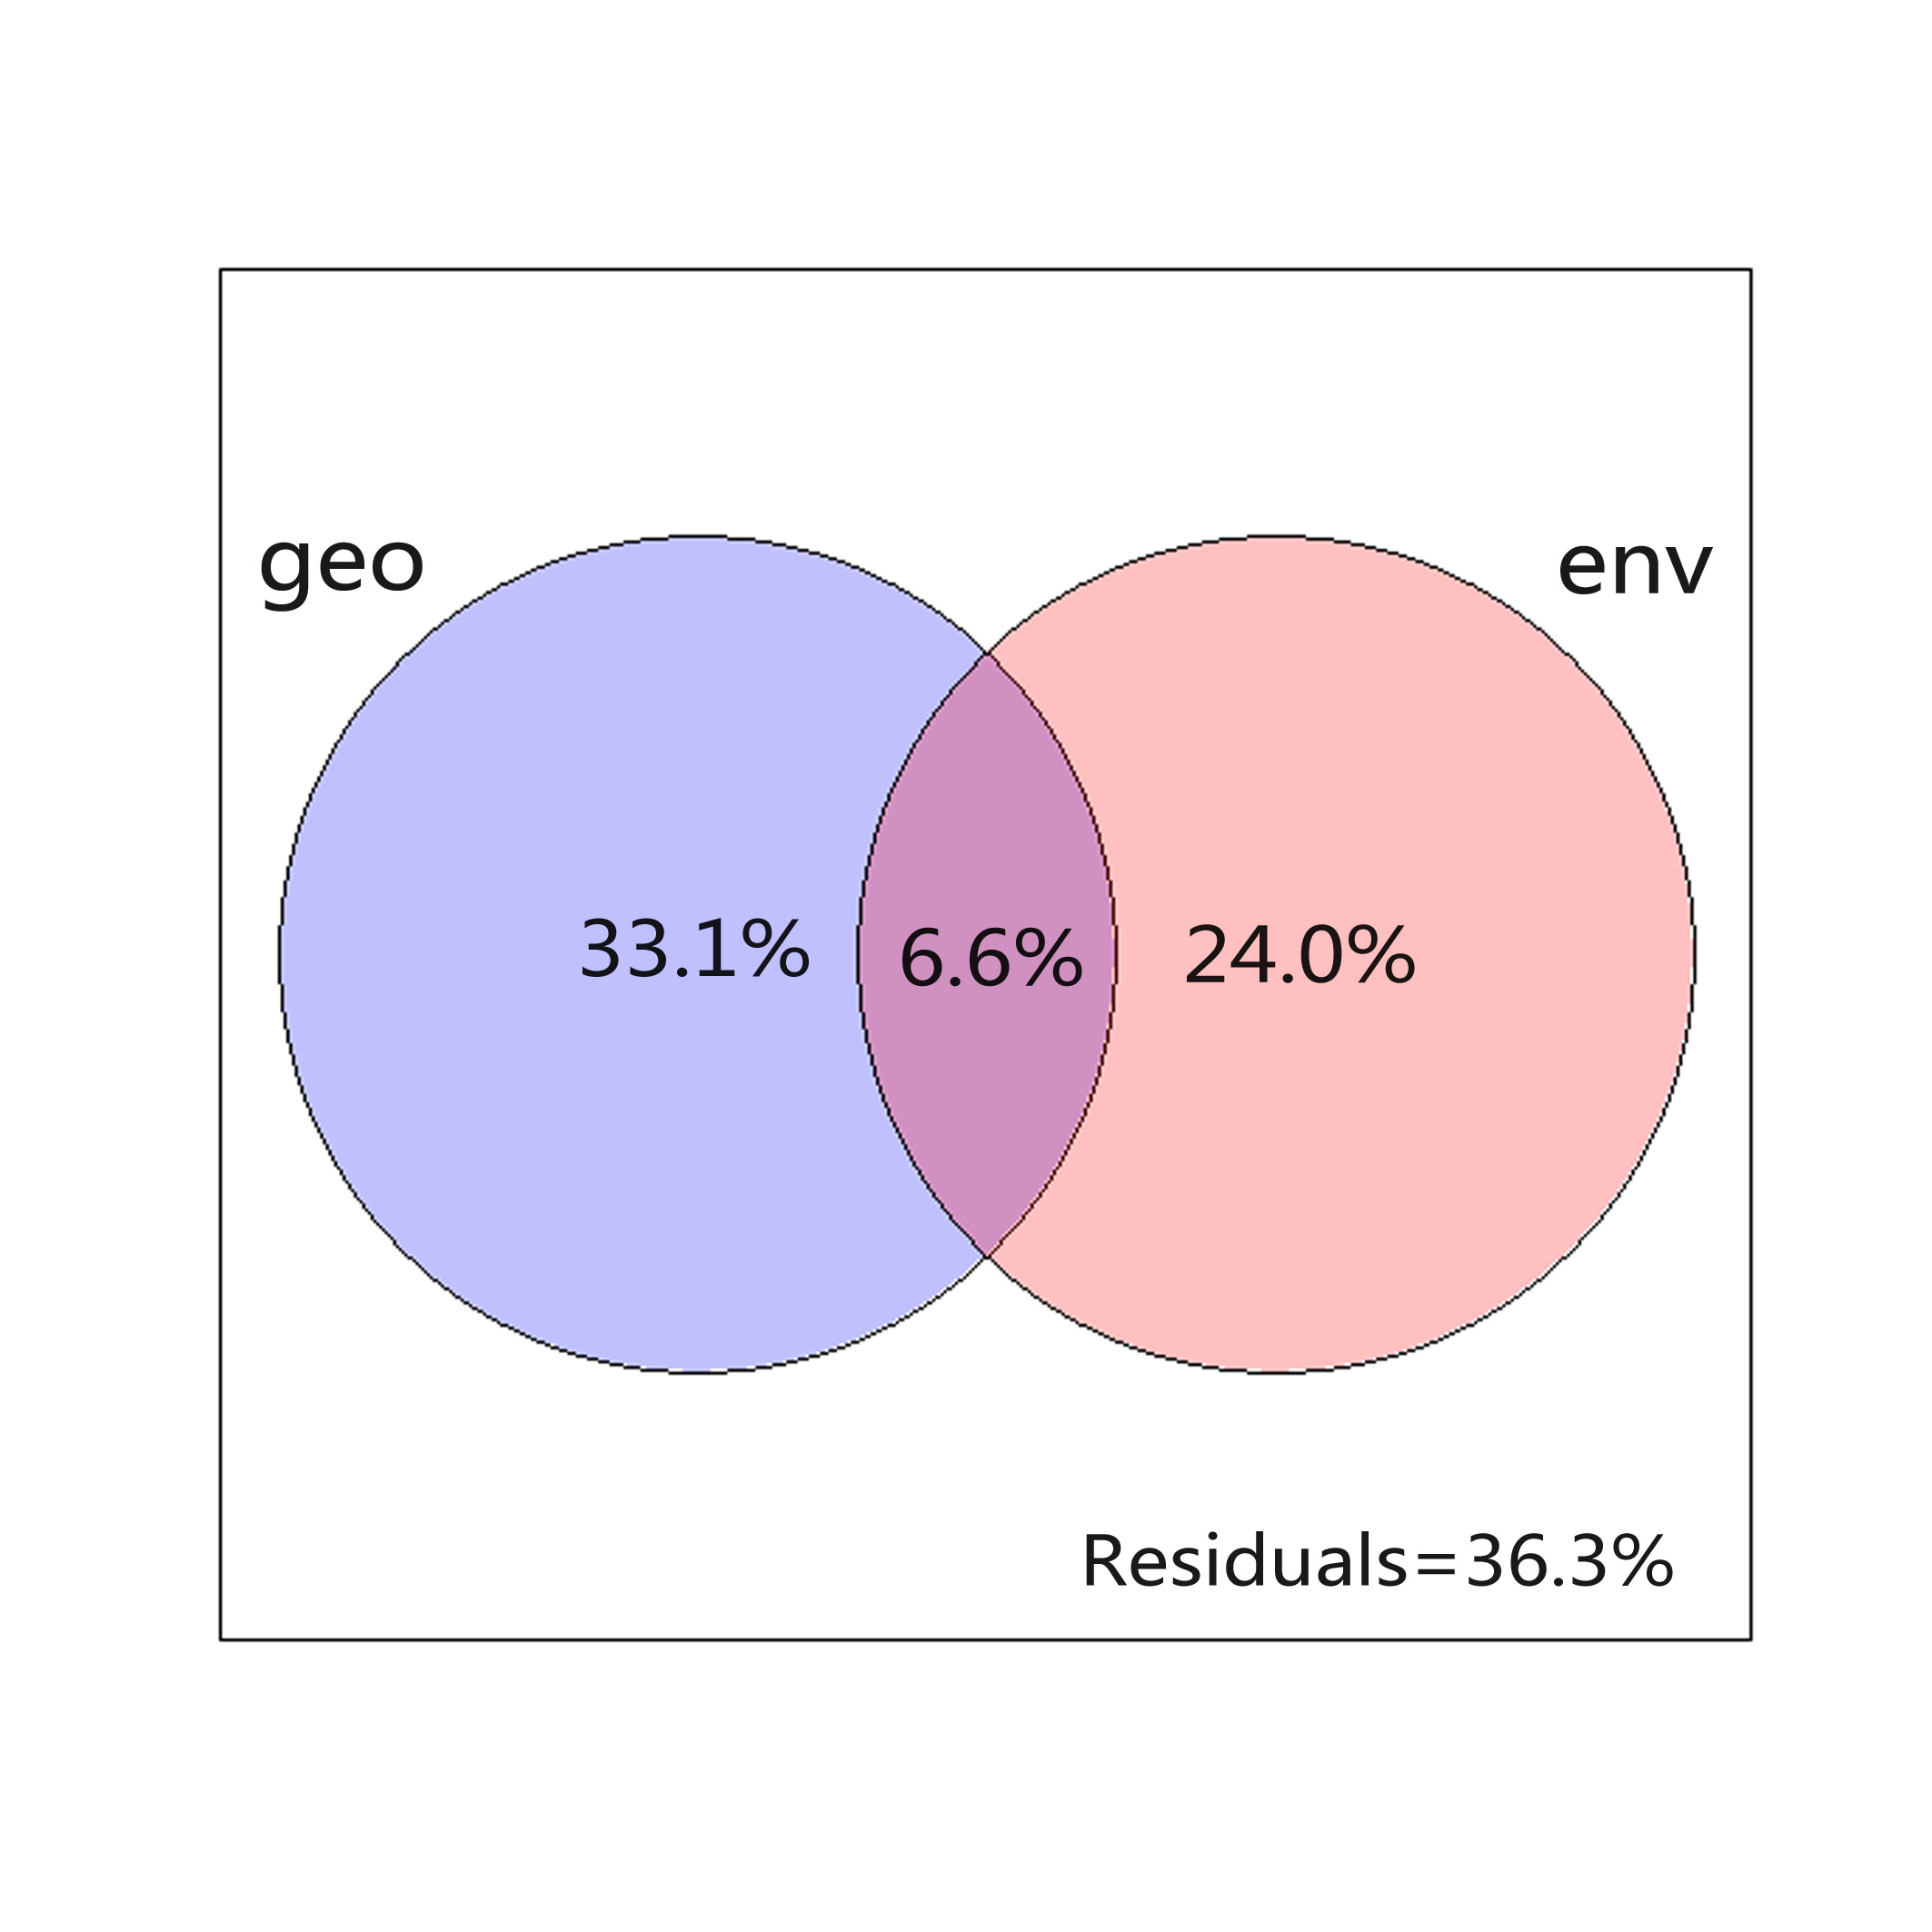

Supplement: s1 [file s1 › diversity-1481916-supplementary/Supplementary Files (round2)/Fig.S4.jpg]

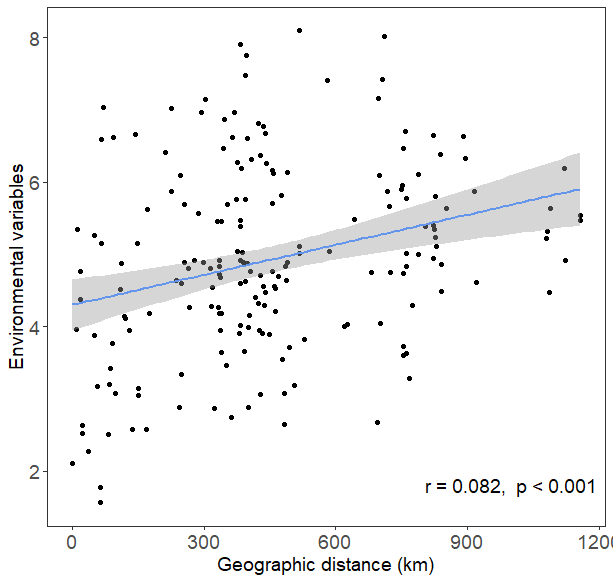

Supplement: s1 [file s1 › diversity-1481916-supplementary/Supplementary Files (round2)/Fig.S5.tiff]
